# Supplementary material
Source: PubMed Central journal article supplement (PMC1635101)

### EXPLORATION

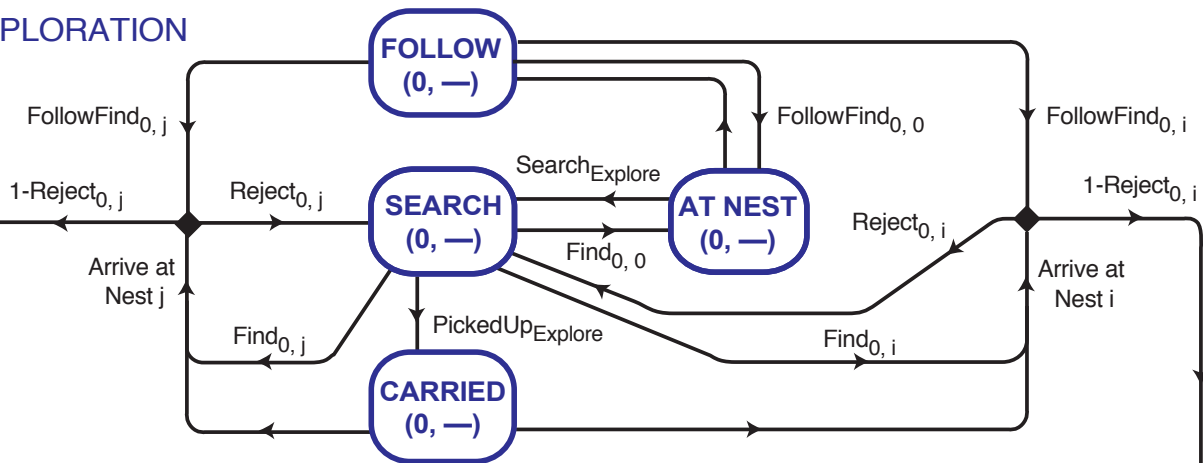

### ASSESSMENT

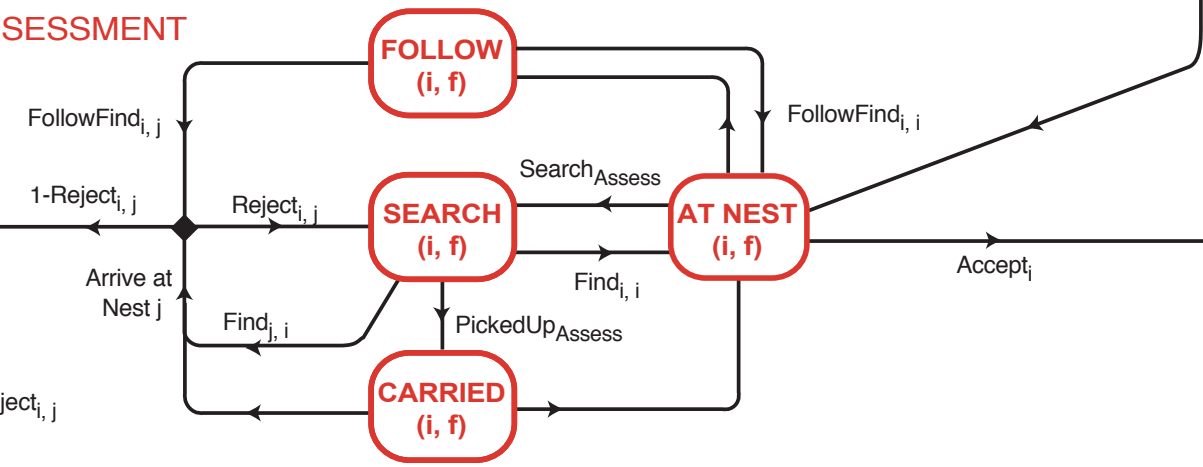

### CANVASSING

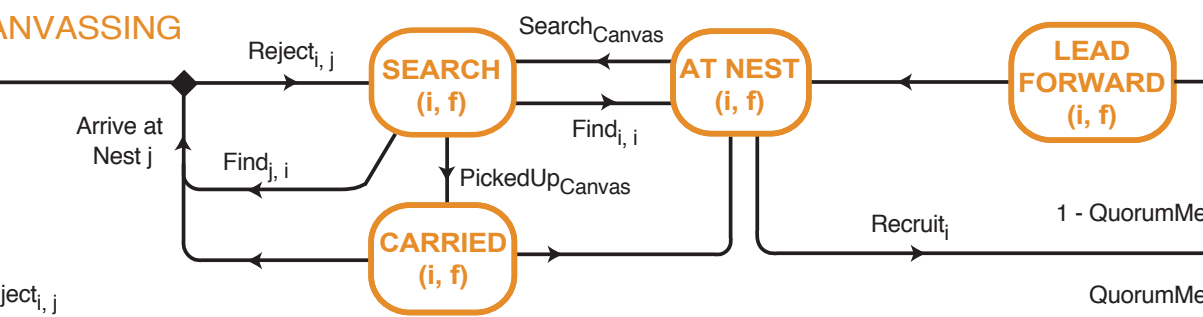

### COMMITTED

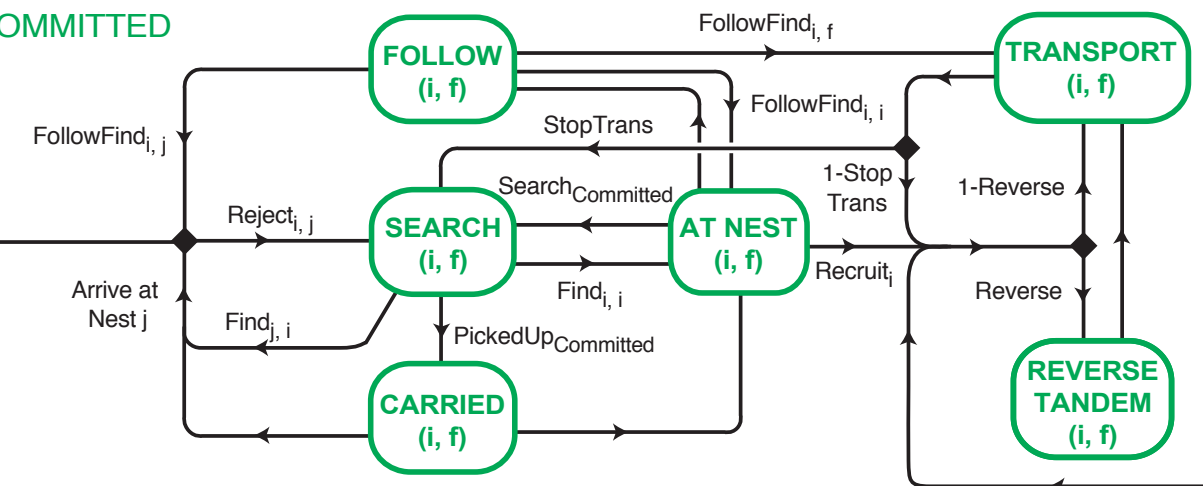

Supplement: pnas_0604801103_1.pdf [file pnas_0604801103_1.pdf]
